# Supplementary material
Source: PubMed Central journal article supplement (PMC5375659)
Supplement: JVI.00023-17_zjv999182484s1.pdf [file JVI.00023-17_zjv999182484s1.pdf]

Supplementary Material for:

**Journal of Virology**

**Molecular analysis of *Arthrobacter* myovirus vB\_ArtM-ArV1: we blame it on the tail**

Laura Kaliniene,<sup>a#</sup> Eugenijus Šimoliūnas,<sup>a</sup> Lidiya Truncaitė,<sup>a</sup> Aurelija Zajančauskaitė,<sup>a</sup> Juozas Nainys,<sup>b</sup>  
Algirdas Kaupinis,<sup>c</sup> Mindaugas Valius,<sup>c</sup> and Rolandas Meškys<sup>a</sup>

<sup>a</sup> Department of Molecular Microbiology and Biotechnology, and <sup>c</sup> Proteomics Centre, Institute of Biochemistry, Life Sciences Centre, Vilnius University, Vilnius, Lithuania; Department of Eukaryote Gene Engineering, Institute of Biotechnology, Life Sciences Centre, Vilnius University, Vilnius, Lithuania<sup>b</sup>

#Address correspondence to Laura Kaliniene, E-mail: [laura.kaliniene@bchi.vu.lt](mailto:laura.kaliniene@bchi.vu.lt)

**Table S1. Homologous proteins found in *Arthrobacter* phages ArV1, Martha, Jawnski, PrincessTrina, TaeYoung, Brent, Sonny, and BarretLemon as determined by CoreGenes 3.5 (<http://binf.gmu.edu:8080/CoreGenes3.5/BatchCoreGenes.html>).**

|          | <b>Arthrobacter<br/>phage vB_ArM-<br/>ArV1<br/><a href="#">NC_026606</a></b> | <b>Arthrobacter<br/>phage<br/>Martha<br/><a href="#">KU160656</a></b> | <b>Arthrobacter<br/>phage Jawnski<br/><a href="#">KU160651</a></b> | <b>Arthrobacter<br/>phage<br/>PrincessTrina<br/><a href="#">KU160660</a></b> | <b>Arthrobacter<br/>phage<br/>TaeYoung<br/><a href="#">KU160668</a></b> | <b>Arthrobacter<br/>phage Brent<br/><a href="#">KT365401</a></b> | <b>Arthrobacter<br/>phage Sonny<br/><a href="#">KU160665</a></b>  | <b>Arthrobacter<br/>phage<br/>BarretLemon<br/><a href="#">KU647629</a></b> |
|----------|------------------------------------------------------------------------------|-----------------------------------------------------------------------|--------------------------------------------------------------------|------------------------------------------------------------------------------|-------------------------------------------------------------------------|------------------------------------------------------------------|-------------------------------------------------------------------|----------------------------------------------------------------------------|
| <b>1</b> | GI: <a href="#">764161603</a><br>terminase large<br>subunit                  | GI: <a href="#">974133111</a><br>terminase large<br>subunit           | GI: <a href="#">974132783</a><br>terminase large<br>subunit        | GI: <a href="#">974133309</a><br>terminase large<br>subunit                  | GI: <a href="#">974133927</a><br>terminase large<br>subunit             | GI: <a href="#">928542245</a><br>terminase large<br>subunit      | GI: <a href="#">974133735</a><br>terminase large<br>subunit       | GI: <a href="#">1001941625</a><br>terminase large<br>subunit               |
| <b>2</b> | GI: <a href="#">764161604</a><br>portal protein                              | GI: <a href="#">974133112</a><br>portal protein                       | GI: <a href="#">974132784</a><br>portal protein                    | GI: <a href="#">974133310</a><br>portal protein                              | GI: <a href="#">974133928</a><br>portal protein                         | GI: <a href="#">928542246</a><br>portal protein                  | GI: <a href="#">974133736</a><br>portal protein                   | GI: <a href="#">1001941626</a><br>portal protein                           |
| <b>3</b> | GI: <a href="#">764161605</a><br>putative<br>structural protein              | GI: <a href="#">974133113</a><br>capsid<br>maturation<br>protease     | GI: <a href="#">974132785</a><br>hypothetical<br>protein           | GI: <a href="#">974133311</a><br>head assembly<br>protein                    | GI: <a href="#">974133929</a><br>capsid<br>maturation<br>protease       | GI: <a href="#">928542247</a><br>hypothetical<br>protein         | GI: <a href="#">974133737</a><br>capsid<br>maturation<br>protease | GI: <a href="#">1001941627</a><br>hypothetical<br>protein                  |
| <b>4</b> | GI: <a href="#">764161606</a><br>hypothetical<br>protein                     | GI: <a href="#">974133114</a><br>hypothetical<br>protein              | GI: <a href="#">974132786</a><br>hypothetical<br>protein           | GI: <a href="#">974133312</a><br>hypothetical<br>protein                     | GI: <a href="#">974133930</a><br>hypothetical<br>protein                | GI: <a href="#">928542248</a><br>hypothetical<br>protein         | GI: <a href="#">974133738</a><br>hypothetical<br>protein          | GI: <a href="#">1001941628</a><br>hypothetical<br>protein                  |
| <b>5</b> | GI: <a href="#">764161609</a><br>putative<br>structural protein              | GI: <a href="#">974133116</a><br>scaffolding<br>protein               | GI: <a href="#">974132787</a><br>scaffolding<br>protein            | GI: <a href="#">974133316</a><br>capsid maturation<br>protease               | GI: <a href="#">974133932</a><br>scaffolding<br>protein                 | GI: <a href="#">928542249</a><br>scaffolding<br>protein          | GI: <a href="#">974133740</a><br>scaffolding<br>protein           | GI: <a href="#">1001941629</a><br>scaffolding<br>protein                   |
| <b>6</b> | GI: <a href="#">764161610</a><br>putative<br>structural protein              | GI: <a href="#">974133117</a><br>hypothetical<br>protein              | GI: <a href="#">974132788</a><br>hypothetical<br>protein           | GI: <a href="#">974133317</a><br>head decoration<br>protein                  | GI: <a href="#">974133933</a><br>hypothetical<br>protein                | GI: <a href="#">928542250</a><br>hypothetical<br>protein         | GI: <a href="#">974133741</a><br>hypothetical<br>protein          | GI: <a href="#">1001941630</a><br>hypothetical<br>protein                  |
| <b>7</b> | GI: <a href="#">764161611</a><br>major capsid<br>protein                     | GI: <a href="#">974133118</a><br>major capsid<br>protein              | GI: <a href="#">974132789</a><br>major capsid<br>subunit           | GI: <a href="#">974133318</a><br>major capsid<br>subunit                     | GI: <a href="#">974133934</a><br>major capsid<br>subunit                | GI: <a href="#">928542251</a><br>major capsid<br>protein         | GI: <a href="#">974133742</a><br>major capsid<br>subunit          | GI: <a href="#">1001941631</a><br>major capsid<br>protein                  |

|    |                                                                     |                                                            |                                                          |                                                          |                                                            |                                                          |                                                            |                                                             |
|----|---------------------------------------------------------------------|------------------------------------------------------------|----------------------------------------------------------|----------------------------------------------------------|------------------------------------------------------------|----------------------------------------------------------|------------------------------------------------------------|-------------------------------------------------------------|
| 8  | GI: <a href="#">764161612</a><br>putative<br>structural protein     | GI: <a href="#">974133119</a><br>hypothetical<br>protein   | GI: <a href="#">974132790</a><br>hypothetical<br>protein | GI: <a href="#">974133319</a><br>hypothetical<br>protein | GI: <a href="#">974133935</a><br>hypothetical<br>protein   | GI: <a href="#">928542252</a><br>hypothetical<br>protein | GI: <a href="#">974133743</a><br>hypothetical<br>protein   | GI: <a href="#">1001941632</a><br>hypothetical<br>protein   |
| 9  | GI: <a href="#">764161613</a><br>putative<br>structural protein     | GI: <a href="#">974133120</a><br>hypothetical<br>protein   | GI: <a href="#">974132791</a><br>hypothetical<br>protein | GI: <a href="#">974133320</a><br>hypothetical<br>protein | GI: <a href="#">974133936</a><br>hypothetical<br>protein   | GI: <a href="#">928542253</a><br>hypothetical<br>protein | GI: <a href="#">974133744</a><br>hypothetical<br>protein   | GI: <a href="#">1001941633</a><br>hypothetical<br>protein   |
| 10 | GI: <a href="#">764161614</a><br>virion<br>morphogenesis<br>protein | GI: <a href="#">974133121</a><br>head-to-tail<br>connector | GI: <a href="#">974132792</a><br>hypothetical<br>protein | GI: <a href="#">974133321</a><br>minor tail protein      | GI: <a href="#">974133937</a><br>head-to-tail<br>connector | GI: <a href="#">928542254</a><br>head-tail<br>connector  | GI: <a href="#">974133745</a><br>head-to-tail<br>connector | GI: <a href="#">1001941634</a><br>head-to-tail<br>connector |
| 11 | GI: <a href="#">764161615</a><br>putative<br>structural protein     | GI: <a href="#">974133122</a><br>hypothetical<br>protein   | GI: <a href="#">974132793</a><br>hypothetical<br>protein | GI: <a href="#">974133322</a><br>hypothetical<br>protein | GI: <a href="#">974133938</a><br>hypothetical<br>protein   | GI: <a href="#">928542255</a><br>hypothetical<br>protein | GI: <a href="#">974133746</a><br>hypothetical<br>protein   | GI: <a href="#">1001941635</a><br>hypothetical<br>protein   |
| 12 | GI: <a href="#">764161616</a><br>hypothetical<br>protein            | GI: <a href="#">974133123</a><br>hypothetical<br>protein   | GI: <a href="#">974132794</a><br>hypothetical<br>protein | GI: <a href="#">974133323</a><br>hypothetical<br>protein | GI: <a href="#">974133939</a><br>hypothetical<br>protein   | GI: <a href="#">928542256</a><br>hypothetical<br>protein | GI: <a href="#">974133747</a><br>hypothetical<br>protein   | GI: <a href="#">1001941636</a><br>hypothetical<br>protein   |
| 13 | GI: <a href="#">764161617</a><br>tail sheath<br>protein             | GI: <a href="#">974133124</a><br>tail sheath               | GI: <a href="#">974132795</a><br>tail sheath             | GI: <a href="#">974133324</a><br>major tail sheath       | GI: <a href="#">974133940</a><br>tail sheath               | GI: <a href="#">928542257</a><br>tail sheath             | GI: <a href="#">974133748</a><br>tail sheath               | GI: <a href="#">1001941637</a><br>tail sheath<br>protein    |
| 14 | GI: <a href="#">764161618</a><br>putative<br>structural protein     | GI: <a href="#">974133125</a><br>hypothetical<br>protein   | GI: <a href="#">974132796</a><br>hypothetical<br>protein | GI: <a href="#">974133325</a><br>hypothetical<br>protein | GI: <a href="#">974133941</a><br>hypothetical<br>protein   | GI: <a href="#">928542258</a><br>hypothetical<br>protein | GI: <a href="#">974133749</a><br>hypothetical<br>protein   | GI: <a href="#">1001941638</a><br>hypothetical<br>protein   |
| 15 | GI: <a href="#">764161619</a><br>hypothetical<br>protein            | GI: <a href="#">974133126</a><br>hypothetical<br>protein   | GI: <a href="#">974132797</a><br>hypothetical<br>protein | GI: <a href="#">974133326</a><br>hypothetical<br>protein | GI: <a href="#">974133942</a><br>hypothetical<br>protein   | GI: <a href="#">928542259</a><br>hypothetical<br>protein | GI: <a href="#">974133750</a><br>hypothetical<br>protein   | GI: <a href="#">1001941639</a><br>hypothetical<br>protein   |
| 16 | GI: <a href="#">764161620</a><br>tape measure<br>protein            | GI: <a href="#">974133128</a><br>tapemeasure<br>protein    | GI: <a href="#">974132798</a><br>tapemeasure<br>protein  | GI: <a href="#">974133328</a><br>tapemeasure<br>protein  | GI: <a href="#">974133944</a><br>tapemeasure<br>protein    | GI: <a href="#">928542260</a><br>putative<br>tapemeasure | GI: <a href="#">974133752</a><br>tapemeasure<br>protein    | GI: <a href="#">1001941641</a><br>tape measure              |

|           |                                                                        |                                                           |                                                           |                                                           |                                                           |                                                                |                                                           |                                                            |
|-----------|------------------------------------------------------------------------|-----------------------------------------------------------|-----------------------------------------------------------|-----------------------------------------------------------|-----------------------------------------------------------|----------------------------------------------------------------|-----------------------------------------------------------|------------------------------------------------------------|
| <b>17</b> | GI: <a href="#">764161621</a><br>peptidoglycan-binding protein<br>LysM | GI: <a href="#">974133129</a><br>LysM                     | GI: <a href="#">974132799</a><br>LysM domain protein      | GI: <a href="#">974133329</a><br>LysM domain protein      | GI: <a href="#">974133945</a><br>LysM                     | GI: <a href="#">928542261</a><br>peptidoglycan-binding protein | GI: <a href="#">974133753</a><br>LysM                     | GI: <a href="#">1001941642</a><br>LysM                     |
| <b>18</b> | GI: <a href="#">764161622</a><br>CHAP domain protein                   | GI: <a href="#">974133130</a><br>tail protein             | GI: <a href="#">974132800</a><br>tail protein             | GI: <a href="#">974133330</a><br>tail protein             | GI: <a href="#">974133946</a><br>tail protein             | GI: <a href="#">928542262</a><br>peptidoglycan hydrolase       | GI: <a href="#">974133754</a><br>tail protein             | GI: <a href="#">1001941643</a><br>tail protein             |
| <b>19</b> | GI: <a href="#">764161623</a><br>putative structural protein           | GI: <a href="#">974133131</a><br>hypothetical protein     | GI: <a href="#">974132801</a><br>hypothetical protein     | GI: <a href="#">974133331</a><br>tail protein             | GI: <a href="#">974133947</a><br>hypothetical protein     | GI: <a href="#">928542263</a><br>hypothetical protein          | GI: <a href="#">974133755</a><br>hypothetical protein     | GI: <a href="#">1001941644</a><br>hypothetical protein     |
| <b>20</b> | GI: <a href="#">764161624</a><br>putative tail fiber protein           | GI: <a href="#">974133132</a><br>minor tail protein       | GI: <a href="#">974132802</a><br>minor tail protein       | GI: <a href="#">974133332</a><br>tail protein             | GI: <a href="#">974133948</a><br>minor tail protein       | GI: <a href="#">928542264</a><br>hypothetical protein          | GI: <a href="#">974133756</a><br>minor tail protein       | GI: <a href="#">1001941645</a><br>minor tail protein       |
| <b>21</b> | GI: <a href="#">764161625</a><br>putative structural protein           | GI: <a href="#">974133133</a><br>minor tail protein       | GI: <a href="#">974132803</a><br>minor tail protein       | GI: <a href="#">974133333</a><br>tail protein             | GI: <a href="#">974133949</a><br>minor tail protein       | GI: <a href="#">928542265</a><br>hypothetical protein          | GI: <a href="#">974133757</a><br>minor tail protein       | GI: <a href="#">1001941646</a><br>minor tail protein       |
| <b>22</b> | GI: <a href="#">764161628</a><br>lysin                                 | GI: <a href="#">974133137</a><br>endolysin                | GI: <a href="#">974132807</a><br>endolysin                | GI: <a href="#">974133337</a><br>endolysin                | GI: <a href="#">974133953</a><br>endolysin                | GI: <a href="#">928542269</a><br>lysin                         | GI: <a href="#">974133761</a><br>gendolysin               | GI: <a href="#">1001941650</a><br>endolysin                |
| <b>23</b> | GI: <a href="#">764161634</a><br>baseplate wedge subunit               | GI: <a href="#">974133139</a><br>tail lysozyme            | GI: <a href="#">974132809</a><br>hypothetical protein     | GI: <a href="#">974133344</a><br>baseplate wedge subunit  | GI: <a href="#">974133955</a><br>tail lysozyme            | GI: <a href="#">928542271</a><br>tail lysozyme                 | GI: <a href="#">974133763</a><br>tail lysozyme            | GI: <a href="#">1001941652</a><br>tail lysozyme            |
| <b>24</b> | GI: <a href="#">764161635</a><br>baseplate J-like protein              | GI: <a href="#">974133140</a><br>baseplate J-like protein | GI: <a href="#">974132810</a><br>baseplate J-like protein | GI: <a href="#">974133345</a><br>baseplate J-like protein | GI: <a href="#">974133956</a><br>baseplate J-like protein | GI: <a href="#">928542272</a><br>baseplate J-like protein      | GI: <a href="#">974133764</a><br>baseplate J-like protein | GI: <a href="#">1001941653</a><br>baseplate J-like protein |
| <b>25</b> | GI: <a href="#">764161636</a><br>putative structural protein           | GI: <a href="#">974133141</a><br>tail protein             | GI: <a href="#">974132811</a><br>tail protein             | GI: <a href="#">974133346</a><br>hypothetical protein     | GI: <a href="#">974133957</a><br>tail protein             | GI: <a href="#">928542273</a><br>hypothetical protein          | GI: <a href="#">974133765</a><br>tail protein             | GI: <a href="#">1001941654</a><br>tail protein             |

|           |                                                                     |                                                                     |                                                                       |                                                                     |                                                                       |                                                                            |                                                                     |                                                                             |
|-----------|---------------------------------------------------------------------|---------------------------------------------------------------------|-----------------------------------------------------------------------|---------------------------------------------------------------------|-----------------------------------------------------------------------|----------------------------------------------------------------------------|---------------------------------------------------------------------|-----------------------------------------------------------------------------|
| <b>26</b> | GI: <a href="#">764161641</a><br>endonuclease                       | GI: <a href="#">974133143</a><br>exonuclease                        | GI: <a href="#">974132813</a><br>exonuclease                          | GI: <a href="#">974133352</a><br>endonuclease                       | GI: <a href="#">974133959</a><br>exonuclease                          | GI: <a href="#">928542275</a><br>exonuclease                               | GI: <a href="#">974133767</a><br>exonuclease                        | GI: <a href="#">1001941656</a><br>exonuclease                               |
| <b>27</b> | GI: <a href="#">764161642</a><br>recombinase<br>RecT                | GI: <a href="#">974133144</a><br>RecT-like<br>recombinase           | GI: <a href="#">974132814</a><br>RecT-like protein                    | GI: <a href="#">974133353</a><br>recombinase                        | GI: <a href="#">974133960</a><br>RecT-like<br>recombinase             | GI: <a href="#">928542276</a><br>RecT-like<br>recombinase                  | GI: <a href="#">974133768</a><br>RecT-like<br>recombinase           | GI: <a href="#">1001941657</a><br>RecT-like<br>recombinase                  |
| <b>28</b> | GI: <a href="#">764161683</a><br>endodeoxyribonu<br>clease          | GI: <a href="#">974133151</a><br>RusA                               | GI: <a href="#">974132820</a><br>RusA                                 | GI: <a href="#">974133400</a><br>endodeoxyribonu<br>clease          | GI: <a href="#">974133967</a><br>RusA                                 | GI: <a href="#">928542283</a><br>endodeoxyribonu<br>clease                 | GI: <a href="#">974133775</a><br>RusA                               | GI: <a href="#">1001941664</a><br>RusA-like protein                         |
| <b>29</b> | GI: <a href="#">764161689</a><br>ssDNA-binding<br>protein           | GI: <a href="#">974133146</a><br>ssDNA binding<br>protein           | GI: <a href="#">974132816</a><br>ssDNA binding<br>domain protein      | GI: <a href="#">974133405</a><br>ssDNA binding<br>protein           | GI: <a href="#">974133962</a><br>ssDNA binding<br>protein             | GI: <a href="#">928542278</a><br>single-stranded<br>DNA-binding<br>protein | GI: <a href="#">974133770</a><br>ssDNA binding<br>protein           | GI: <a href="#">1001941659</a><br>single-stranded<br>DNA binding<br>protein |
| <b>30</b> | GI: <a href="#">764161693</a><br>DNA polymerase<br>III subunit beta | GI: <a href="#">974133182</a><br>DNA polymerase<br>III beta subunit | GI: <a href="#">974132849</a><br>DNA polymerase<br>III beta subunit   | GI: <a href="#">974133408</a><br>DNA polymerase<br>III beta subunit | GI: <a href="#">974133999</a><br>DNA polymerase<br>III beta subunit   | GI: <a href="#">928542313</a><br>DNA polymerase<br>III subunit beta        | GI: <a href="#">974133806</a><br>DNA polymerase<br>III beta subunit | GI: <a href="#">1001941695</a><br>DNA polymerase<br>III beta subunit        |
| <b>31</b> | GI: <a href="#">764161700</a><br>hypothetical<br>protein            | GI: <a href="#">974133177</a><br>hypothetical<br>protein            | GI: <a href="#">974132844</a><br>hypothetical<br>protein              | GI: <a href="#">974133307</a><br>hypothetical<br>protein            | GI: <a href="#">974133994</a><br>hypothetical<br>protein              | GI: <a href="#">928542308</a><br>hypothetical<br>protein                   | GI: <a href="#">974133801</a><br>hypothetical<br>protein            | GI: <a href="#">1001941690</a><br>hypothetical<br>protein                   |
| <b>32</b> | GI: <a href="#">764161701</a><br>hypothetical<br>protein            | GI: <a href="#">974133110</a><br>hypothetical<br>protein            | GI: <a href="#">974132782</a><br>HTH DNA<br>binding domain<br>protein | GI: <a href="#">974133308</a><br>hypothetical<br>protein            | GI: <a href="#">974133926</a><br>HTH DNA<br>binding domain<br>protein | GI: <a href="#">928542244</a><br>HTH DNA<br>binding protein                | GI: <a href="#">974133734</a><br>HTH DNA<br>binding protein         | GI: <a href="#">1001941624</a><br>HTH DNA<br>binding protein                |
